# Supplementary material for: Bioactivation and Regioselectivity of Pig Cytochrome P450 3A29 towards Aflatoxin B1
Source: PubMed Central journal article supplement (PMC5037493; doi:10.3390/toxins8090267), 2016-09-12
Supplement: toxins-08-00267-s001.pdf [file toxins-08-00267-s001.pdf]

## Supplementary Materials: Bioactivation and Regioselectivity of Pig Cytochrome P450 3A29 towards Aflatoxin B<sub>1</sub>

Jun Wu, Ruohong Chen, Caihui Zhang, Kangbai Li, Weiying Xu, Lijuan Wang, Qingmei Chen, Peiqiang Mu, Jun Jiang, Jikai Wen and Yiqun Deng

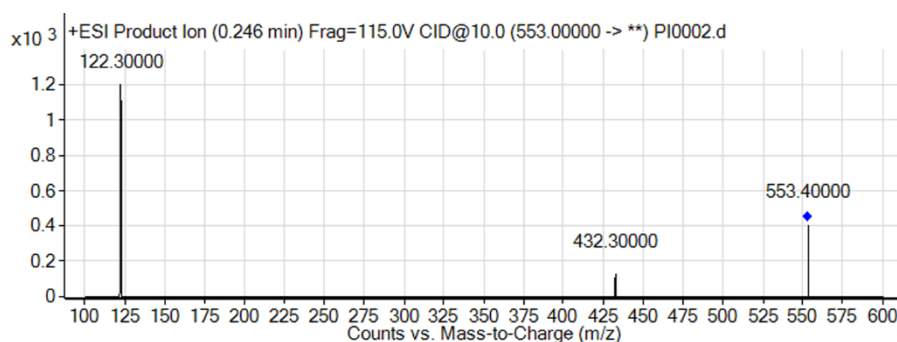

Figure S1. The identification of metabolite by LC-MS/MS.

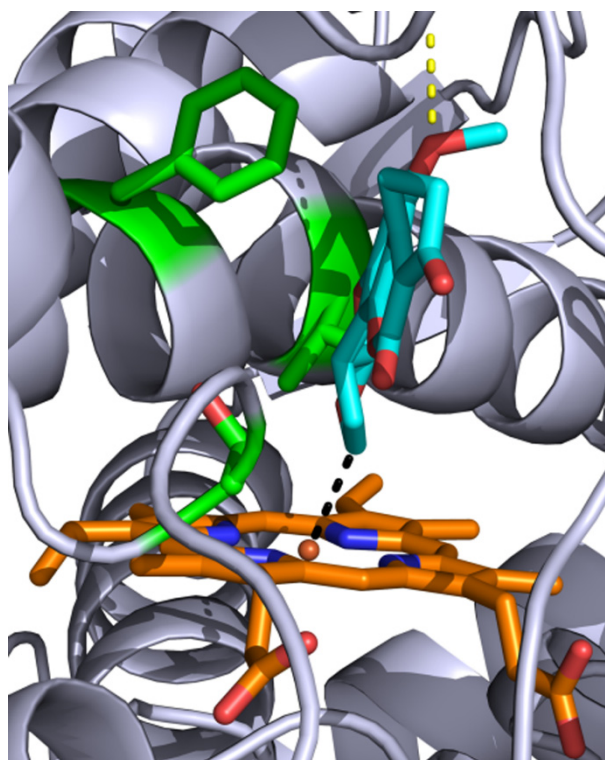

Figure S2. The side view of docking model.

**Table S1.** The relative quantification of metabolic activities of CYP3A29 and its mutants to AFB<sub>1</sub>.

| Enzymes | Dihydrodiol-Tris | AFG <sub>1</sub> | Dihydrodiol-Tris/AFG <sub>1</sub> | Normalized Values * |
|---------|------------------|------------------|-----------------------------------|---------------------|
| WT1     | 1,775,720        | 19,910,728       | 0.089                             | -                   |
| WT2     | 1,970,378        | 20,402,016       | 0.097                             | -                   |
| WT3     | 1,600,007        | 18,956,344       | 0.084                             | 1.00 (0.090)        |
| S119A1  | 403,518          | 21,918,143       | 0.018                             | -                   |
| S119A2  | 1,319,961        | 19,772,791       | 0.067                             | -                   |
| S119A3  | 504,333          | 12,758,786       | 0.040                             | 0.46 (0.042)        |
| F304A1  | 3,506,055        | 15,406,563       | 0.23                              | -                   |
| F304A2  | 4,335,512        | 19,841,307       | 0.22                              | -                   |
| F304A3  | 3,913,793        | 18,719,767       | 0.21                              | 2.42 (0.22)         |
| T309A1  | 120,478          | 5,361,935        | 0.022                             | -                   |
| T309A2  | 467,321          | 20,436,934       | 0.023                             | -                   |
| T309A3  | 456,039          | 20,808,153       | 0.022                             | 0.25 (0.0224)       |

\* The values in brackets represent the average of three repeats.
